# Supplementary material
Source: PubMed Central journal article supplement (PMC9386606)
Supplement: jamapsychiatry-e222386-s002.pdf [file jamapsychiatry-e222386-s002.pdf]

\*First name, last name, and suffix (if applicable) are required and will appear in PubMed.

| <b>*Group Name(s): The Consortium on the Genetics of Schizophrenia-2</b> |                   |                              |                  |                                       |                                          |                                                         |                                                                                            |
|--------------------------------------------------------------------------|-------------------|------------------------------|------------------|---------------------------------------|------------------------------------------|---------------------------------------------------------|--------------------------------------------------------------------------------------------|
| <b>*First Name and Middle Initial(s)</b>                                 | <b>*Last Name</b> | <b>*Suffix (eg, Jr, III)</b> | Academic Degrees | Institution                           | Location (city, state/province, country) | Role or Contribution, eg, chair, principal investigator | Group (if more than 1 Group listed in the byline and/or Subgroup (eg, Steering Committee)) |
| Ruben C                                                                  | Gur               |                              | PhD              | University of Pennsylvania            | Philadelphia, PA, USA                    | Investigator                                            |                                                                                            |
| Raquel E                                                                 | Gur               |                              | MD PhD           | University of Pennsylvania            | Philadelphia, PA, USA                    | Investigator                                            |                                                                                            |
| William S                                                                | Stone             |                              | PhD              | Harvard Medical School                | Boston, MA, USA                          | Investigator                                            |                                                                                            |
| Tiffany A                                                                | Greenwood         |                              | PhD              | University of California, Los Angeles | Los Angeles, CA, USA                     | Investigator                                            |                                                                                            |
| Laura C                                                                  | Lazzeroni         |                              | PhD              | Stanford University                   | Stanford, CA, USA                        | Investigator                                            |                                                                                            |
| Allen D                                                                  | Radant            |                              | MD               | University of Washington              | Seattle, WA, USA                         | Investigator                                            |                                                                                            |
| Larry J                                                                  | Seidman           |                              | PhD              | Harvard Medical School                | Boston, MA, USA                          | Investigator                                            |                                                                                            |
| Larry J                                                                  | Siever            |                              | MD               | Icahn School of Medicine              | New York, NY, USA                        | Investigator                                            |                                                                                            |
| Jeremy M                                                                 | Silverman         |                              | PhD              | Icahn School of Medicine              | New York, NY, USA                        | Investigator                                            |                                                                                            |
| Joyce                                                                    | Sprock            |                              | BA               | University of California, San Diego   | La Jolla, CA, USA                        | Investigator                                            |                                                                                            |
| Catherine A                                                              | Sugar             |                              | PhD              | University of California, Los Angeles | Los Angeles, CA, USA                     | Investigator                                            |                                                                                            |
| Debby W                                                                  | Tsuang            |                              | MD PhD           | University of Washington              | Seattle, WA, USA                         | Investigator                                            |                                                                                            |
| Ming T                                                                   | Tsuang            |                              | MD PhD           | University of California, San Diego   | La Jolla, CA, USA                        | Investigator                                            |                                                                                            |
| Bruce I                                                                  | Turetsky          |                              | MD               | University of Pennsylvania            | Philadelphia, PA, USA                    | Investigator                                            |                                                                                            |
